# Supplementary material for: Influence of crystal structure and composition on optical and electronic properties of pyridinium-based bismuth iodide complexes
Source: Royal Society of Chemistry journal article supplement (doi:10.1039/d3dt02910g), 2023-01-01
Supplement: d3dt02910g1.pdf [file d3dt02910g1.pdf]

## Supporting Information

### **Influence of Crystal Structure and Composition on Optical and Electronic Properties of Pyridinium-based Bismuth Iodide Complexes**

Gisya Abdi,<sup>1\*</sup> Marlena Gryl,<sup>2\*</sup> Andrzej Sławek,<sup>1</sup> Ewelina Kowalewska,<sup>1</sup> Tomasz Mazur,<sup>1</sup> Agnieszka Podborska,<sup>1</sup> Krzysztof Mech,<sup>1</sup> Piotr Zawal,<sup>1</sup> Anurag Pritam,<sup>1</sup> Angelika Kmita,<sup>1</sup> Lulu Alluhaibi,<sup>3</sup> Alexey Maximenko,<sup>3</sup> Chakkooth Vijayakumar,<sup>4</sup> Konrad Szaciłowski<sup>1\*</sup>

<sup>1</sup>Academic Centre for Materials and Nanotechnology, AGH University of Krakow, Kawiory 30, 30-055 Kraków, Poland

<sup>2</sup>Faculty of Chemistry, Jagiellonian University, Gronostajowa 2, 30-387 Kraków, Poland

<sup>3</sup>National Synchrotron Radiation Centre SOLARIS, Czerwone Maki 98, 30-392 Kraków, Poland

<sup>4</sup>Photosciences and Photonics Section, CSIR-National Institute for Interdisciplinary Science and Technology (CSIR-NIIST), Thiruvananthapuram 695 019, India

*Keywords. Lead-free perovskite, pyridinium-based bismuth iodide complexes, crystal engineering, electrical conductivity, optical properties, Hirschfeld analysis.*

---

\* Corresponding authors: [agisya@agh.edu.pl](mailto:agisya@agh.edu.pl), [marlena.gryl@uj.edu.pl](mailto:marlena.gryl@uj.edu.pl) and [szacilow@agh.edu.pl](mailto:szacilow@agh.edu.pl)

**Table SI 1.** Elemental analysis of obtained pyridinium iodobismuthates.

| Compound                  | Mass average <sup>1</sup> /C:H:N | Mole ratios (Experimental result) <sup>1</sup> | Mole ratios (Theoretical result) <sup>2</sup> |
|---------------------------|----------------------------------|------------------------------------------------|-----------------------------------------------|
| 4-AmpyBiI <sub>3</sub>    | 9.14:3.73:0.98                   | 5.71:7.24:2                                    | 5:7:2                                         |
| 4-MetpyBiI <sub>3</sub>   | 8.84: 0.96: 1.62                 | 6.37:8.24: 1                                   | 6:8:1                                         |
| 4-DimetpyBiI <sub>3</sub> | 14.49: 1.9: 4.68                 | 7.2:11.25: 2                                   | 7:11:2                                        |
| 4-CNpyBiI <sub>3</sub>    | 9.46:3.21:0.861                  | 6.88:7.4:6:2                                   | 6:5:2                                         |

<sup>1</sup>Elemental analysis<sup>2</sup>Protonated organic moiety**Table SI2.** Summary of TG-DTG results.

| Compound                | $\Delta m$ [%]         | T <sub>decomposition</sub> |                         |                         |
|-------------------------|------------------------|----------------------------|-------------------------|-------------------------|
|                         |                        | T <sub>start</sub> , [°C]  | T <sub>max</sub> , [°C] | T <sub>end</sub> , [°C] |
| 4-AmpyBiI <sub>3</sub>  | 99.98 %                | 236.4                      | 400.2                   | 405.7                   |
|                         | (24 °C – 500 °C)       |                            |                         |                         |
| 4-MepyBiI <sub>3</sub>  | 99.81%                 | 231.1                      | 371.8                   | 378.3                   |
|                         | (24 °C – 500 °C)       |                            |                         |                         |
| 4-DmapyBiI <sub>3</sub> | 93.93%                 | 282.9                      | 416.5                   | 449.5                   |
|                         | (24 °C – 500 °C)       |                            |                         |                         |
| 4-CNpyBiI <sub>3</sub>  | 23 %                   | 93.3                       | 239.7                   | 245.7                   |
|                         | (24 °C – 246°C)        |                            |                         |                         |
| pyBiI <sub>3</sub>      | 76.98 %                | 246                        | 350                     | 400                     |
|                         | (246 °C - 400 °C)      |                            |                         |                         |
| pyBiI <sub>3</sub>      | 26.88%                 | 78                         | 141                     | 159.03                  |
|                         | (24 °C – 159.03°C)     |                            |                         |                         |
| pyBiI <sub>3</sub>      | 73.34%                 | 159.03                     | 233.89                  | 274.98                  |
|                         | (159.03 °C – 274.98°C) |                            |                         |                         |

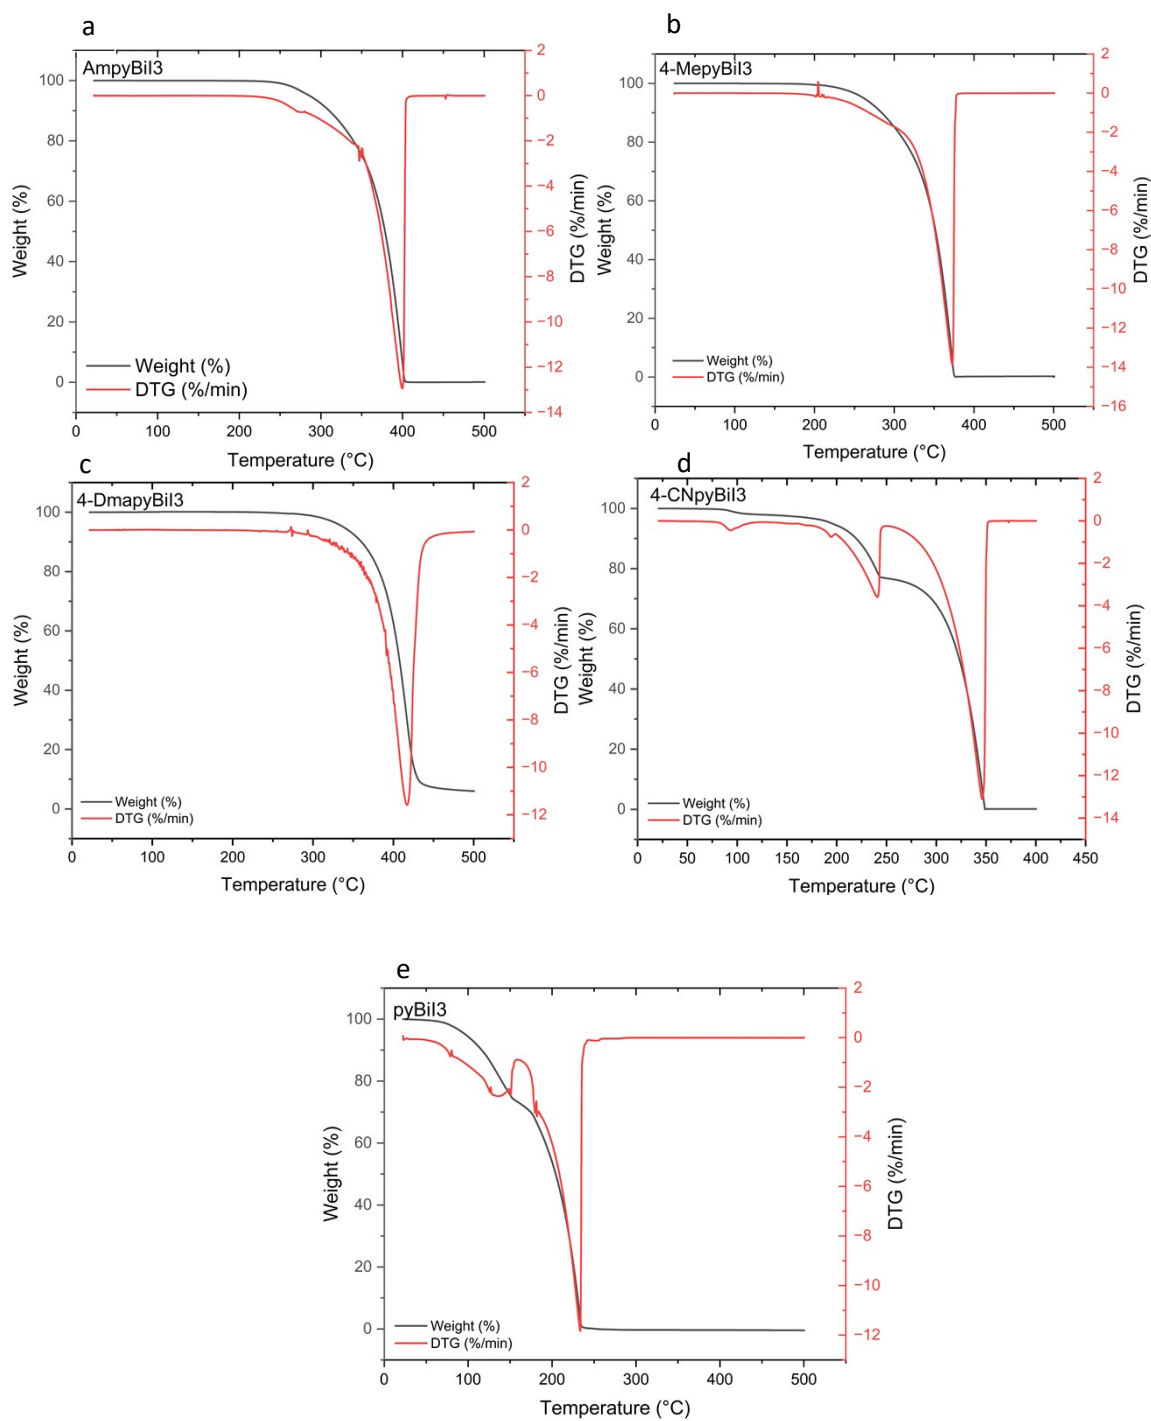

**Figure SI 1.** TG-DTA of a) 4-AmpyBiI<sub>3</sub> b) 4-MepyBiI<sub>3</sub> c) 4-DmepyBiI<sub>3</sub> d) 4-CNpyBiI<sub>3</sub> e) pyBiI<sub>3</sub>.

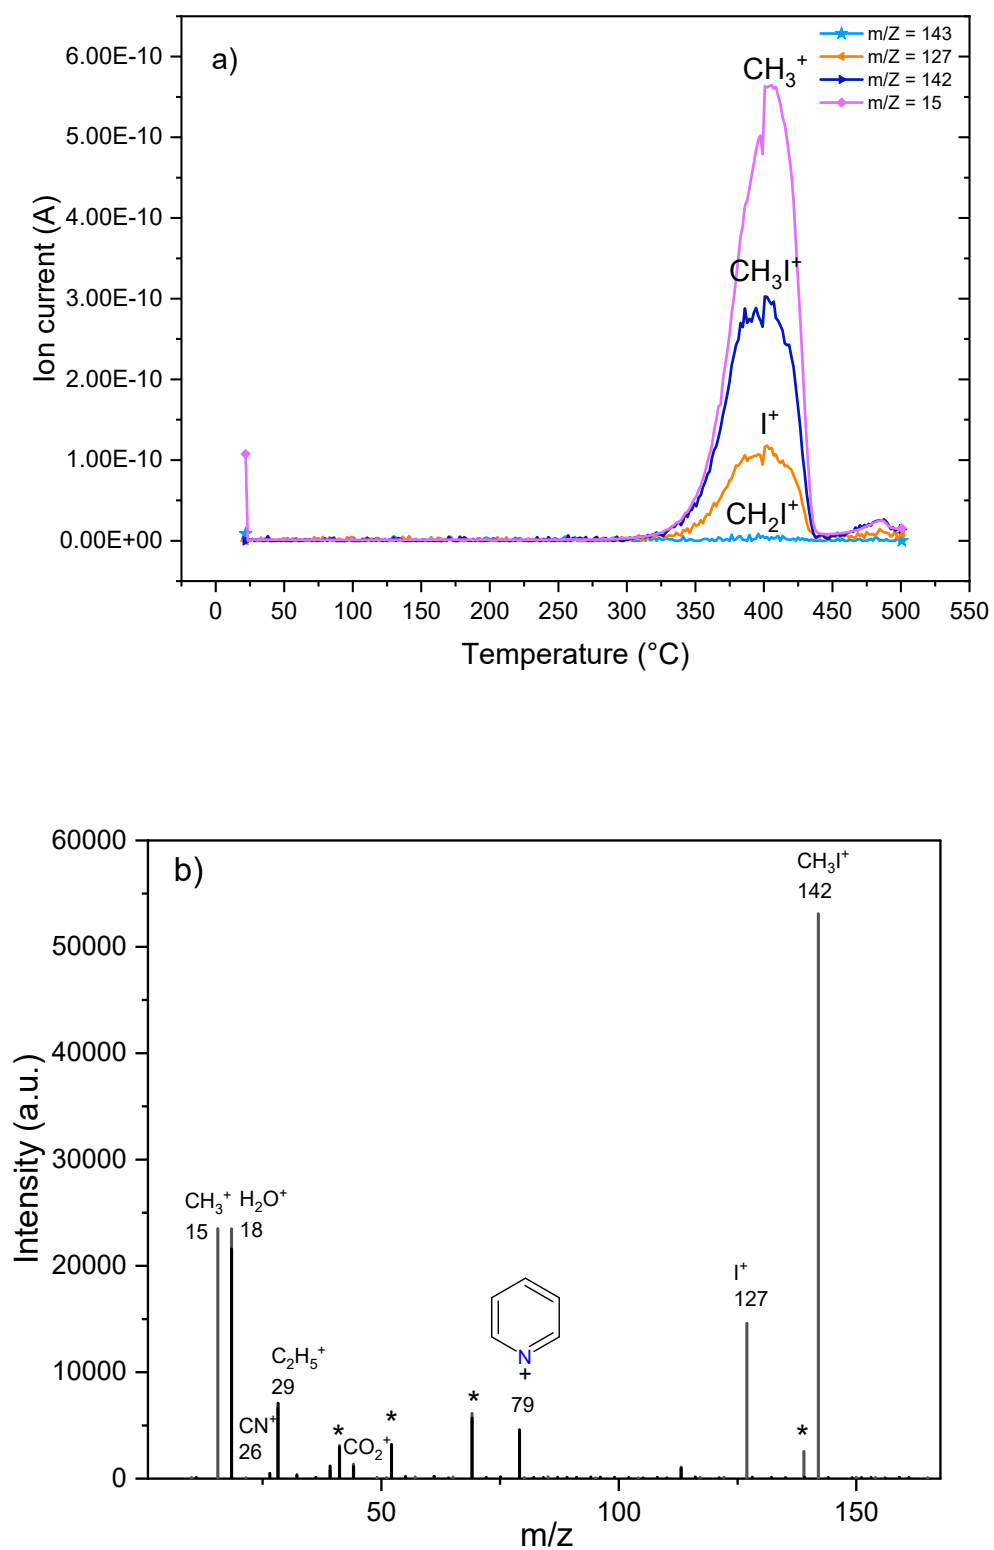

**Figure SI 2.** (a) TGA-Mass spectrum of 4-DmepyBiI<sub>3</sub>, (b) GC-Mass spectrum of 4-MepyBiI<sub>3</sub>.

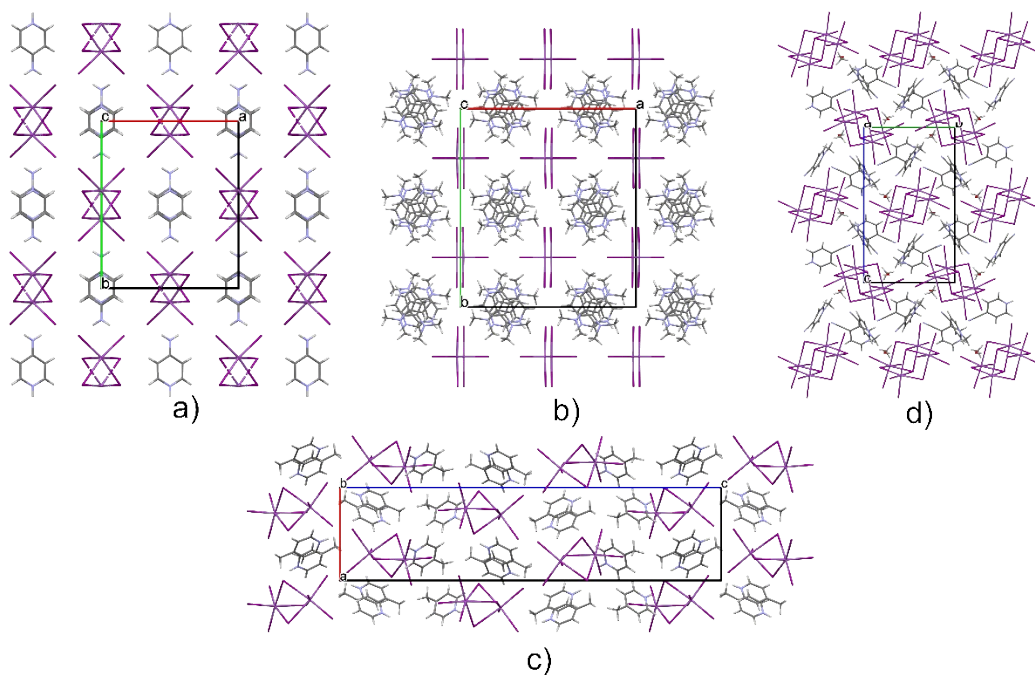

**Figure SI 3.** Packing of the structural components in a) 4-AmpyBiI<sub>3</sub> along [001], b) 4-DmapyBiI<sub>3</sub> along [001], c) 4-CNpyBiI<sub>3</sub> along [010], d) 4-MepyBiI<sub>3</sub> along [100].

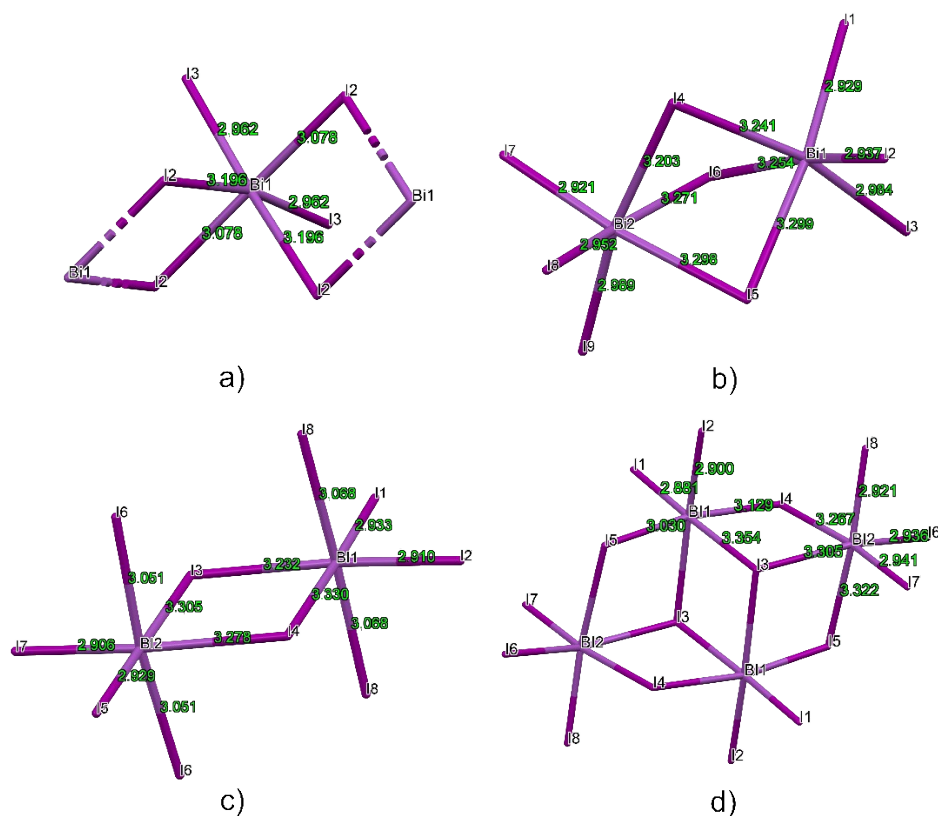

**Figure SI 4.** a) [Bi<sub>4</sub>]<sub>n</sub> in 4-AmpyBiI<sub>3</sub> along [001], b) Bi<sub>2</sub>I<sub>9</sub> in 4-DmapyBiI<sub>3</sub> along [001], c) Bi<sub>2</sub>I<sub>10</sub> in 4-CNpyBiI<sub>3</sub> along [010], d) Bi<sub>4</sub>I<sub>16</sub> in 4-MepyBiI<sub>3</sub> along [100].

**Table SI3.** Geometry of weak interactions in 4-AmpyBiI<sub>3</sub> (1) [ $\text{\AA}/^\circ$ ]

| D-H...A                                                                                                                                                                         | d(D-H)  | d(H...A) | d(D...A)   | <(DHA) |
|---------------------------------------------------------------------------------------------------------------------------------------------------------------------------------|---------|----------|------------|--------|
| N(8)-H(8)...I(3)                                                                                                                                                                | 0.88    | 3.06     | 3.715(3)   | 133.0  |
| N(8)-H(8)...I(3)#1                                                                                                                                                              | 0.88    | 3.06     | 3.715(3)   | 133.0  |
| N(4)-H(4A)...I(3)#4                                                                                                                                                             | 0.87(2) | 2.93(5)  | 3.7242(18) | 153(9) |
| C(7)-H(7)...I(2)#5                                                                                                                                                              | 0.95    | 3.31     | 3.805(3)   | 114.5  |
| C(5)-H(5)...I(2)#6                                                                                                                                                              | 0.95    | 3.10     | 3.947(3)   | 149.7  |
| Symmetry transformations used to generate equivalent atoms:<br>#1 -x+1,y,-z+3/2 #2 -x+1,-y+2,-z+1 #3 x,-y+2,z+1/2<br>#4 -x+1,-y+1,-z+2 #5 -x+1/2,-y+3/2,z+1/2 #6 -x+1/2,y-1/2,z |         |          |            |        |

**Table SI4.** Geometry of weak interactions in 4-DmapyBiI<sub>3</sub> [ $\text{\AA}/^\circ$ ]

| D-H...A                                                                                                                                                                                                 | d(D-H) | d(H...A) | d(D...A) | <(DHA) |
|---------------------------------------------------------------------------------------------------------------------------------------------------------------------------------------------------------|--------|----------|----------|--------|
| C(3A)-H(3A)...I(8)#2                                                                                                                                                                                    | 0.95   | 3.08     | 3.965(3) | 155.8  |
| C(6A)-H(6A)...I(6)#3                                                                                                                                                                                    | 0.95   | 3.06     | 3.723(3) | 128.6  |
| C(6A)-H(6A)...I(8)                                                                                                                                                                                      | 0.95   | 3.29     | 3.827(3) | 118.0  |
| C(8A)-H(8A2)...I(1)#4                                                                                                                                                                                   | 0.98   | 3.26     | 4.110(4) | 146.6  |
| N(1A)-H(1A)...I(3)                                                                                                                                                                                      | 0.88   | 2.92     | 3.702(3) | 148.2  |
| N(1B)-H(1B)...I(4)                                                                                                                                                                                      | 0.88   | 2.74     | 3.528(3) | 149.2  |
| C(2B)-H(2B)...I(6)#3                                                                                                                                                                                    | 0.95   | 3.12     | 3.853(3) | 135.5  |
| C(2A)-H(2A)...I(2)#2                                                                                                                                                                                    | 0.95   | 3.08     | 4.002(3) | 164.2  |
| C(5B)-H(5B)...I(8)#5                                                                                                                                                                                    | 0.95   | 3.22     | 4.090(3) | 152.3  |
| C(7B)-H(7B1)...I(2)#6                                                                                                                                                                                   | 0.98   | 3.26     | 3.774(4) | 114.2  |
| C(7B)-H(7B2)...I(5)#7                                                                                                                                                                                   | 0.98   | 3.33     | 3.966(4) | 124.7  |
| C(7B)-H(7B3)...I(7)#3                                                                                                                                                                                   | 0.98   | 3.22     | 3.796(5) | 119.5  |
| C(5A)-H(5A)...I(6)#3                                                                                                                                                                                    | 0.95   | 3.30     | 3.841(3) | 118.3  |
| Symmetry transformations used to generate equivalent atoms:<br>#1 x,-y+1/2,z; #2 x-1/2,y,-z+3/2; #3 -x+1,-y+1,-z+1; #4 -x+1/2,-y+1,z-1/2; #5 x+1/2,y,-z+3/2; #6 -x+3/2,-y+1,z-1/2; #7 -x+3/2,-y+1,z+1/2 |        |          |          |        |

**Table SI5.** Geometry of weak interactions in 4-CNpyBiI<sub>3</sub> [ $\text{\AA}/^\circ$ ]

| D-H...A                                                                                                                                       | d(D-H) | d(H...A) | d(D...A)  | <(DHA) |
|-----------------------------------------------------------------------------------------------------------------------------------------------|--------|----------|-----------|--------|
| C(6A)-H(6A)...I(2)#2                                                                                                                          | 0.93   | 3.33     | 4.170(8)  | 151.7  |
| C(3A)-H(3A)...I(6)                                                                                                                            | 0.93   | 3.25     | 4.012(8)  | 140.1  |
| C(2A)-H(2A)...I(4)                                                                                                                            | 0.93   | 3.23     | 4.100(8)  | 157.0  |
| C(2A)-H(2A)...I(5)                                                                                                                            | 0.93   | 3.31     | 3.774(7)  | 113.0  |
| O(1)-H(1)...I(7)                                                                                                                              | 0.82   | 2.91     | 3.597(10) | 142.8  |
| C(6B)-H(6B)...N(2B)#3                                                                                                                         | 0.93   | 2.45     | 3.079(16) | 125.2  |
| N(1B)-H(1B)...O(1)                                                                                                                            | 0.86   | 1.85     | 2.631(15) | 149.5  |
| C(2B)-H(2B)...I(6)#4                                                                                                                          | 0.93   | 3.14     | 3.966(13) | 149.2  |
| C(3B)-H(3B)...I(7)#4                                                                                                                          | 0.93   | 3.13     | 4.058(13) | 175.4  |
| C(1)-H(1D)...I(1)#5                                                                                                                           | 0.96   | 2.94     | 3.843(14) | 157.1  |
| C(7A)-H(7AB)...I(4)                                                                                                                           | 0.96   | 3.17     | 4.082(10) | 158.3  |
| Symmetry transformations used to generate equivalent atoms:<br>#1 #2 x-1/2,-y+1/2,-z-1/2 #3 -x+3/2,y+1/2,-z+1/2<br>#4 -x+2,-y,-z+1 #5 x+1,y,z |        |          |           |        |

**Table SI6.** Geometry of weak interactions in (3) [ $\text{\AA}/^\circ$ ]

| D-H...A                                                                                                                                                                       | d(D-H) | d(H...A) | d(D...A)  | <(DHA) |
|-------------------------------------------------------------------------------------------------------------------------------------------------------------------------------|--------|----------|-----------|--------|
| N(1A)-H(1A)...I(9)#1                                                                                                                                                          | 0.88   | 2.70     | 3.560(10) | 166.0  |
| C(6A)-H(6A)...I(6)#2                                                                                                                                                          | 0.95   | 3.25     | 4.085(11) | 147.9  |
| C(2C)-H(2C)...I(4)#3                                                                                                                                                          | 0.95   | 3.24     | 3.991(12) | 137.2  |
| C(2C)-H(2C)...I(1)#3                                                                                                                                                          | 0.95   | 3.22     | 3.710(11) | 114.0  |
| N(1B)-H(1B)...I(5)                                                                                                                                                            | 0.88   | 2.75     | 3.604(11) | 163.6  |
| N(1C)-H(1C)...I(3)                                                                                                                                                            | 0.88   | 2.71     | 3.545(11) | 159.0  |
| C(2A)-H(2A)...I(9)#4                                                                                                                                                          | 0.95   | 3.15     | 3.946(12) | 143.0  |
| C(3A)-H(3A)...I(5)#4                                                                                                                                                          | 0.95   | 3.30     | 4.187(11) | 157.1  |
| C(6B)-H(6B)...I(4)                                                                                                                                                            | 0.95   | 3.07     | 3.797(13) | 134.0  |
| C(6C)-H(6C)...I(8)#5                                                                                                                                                          | 0.95   | 3.22     | 4.118(13) | 158.9  |
| C(5A)-H(5A)...I(1)#2                                                                                                                                                          | 0.95   | 3.14     | 4.051(12) | 160.3  |
| C(5B)-H(5B)...I(1)#2                                                                                                                                                          | 0.95   | 3.03     | 3.791(11) | 138.7  |
| C(5B)-H(5B)...I(2)#6                                                                                                                                                          | 0.95   | 3.27     | 3.941(12) | 129.2  |
| C(5C)-H(5C)...I(7)#7                                                                                                                                                          | 0.95   | 3.13     | 4.073(13) | 170.1  |
| Symmetry transformations used to generate equivalent atoms:<br>#1 x-1/2,-y+3/2,-z+1; #2 x,y+1,z; #3 x+1,y,z; #4 x-1,y,z; #5 x,y-1,z; #6 -x,y+1/2,-z+1/2; #7 x+1/2,-y+1/2,-z+1 |        |          |           |        |

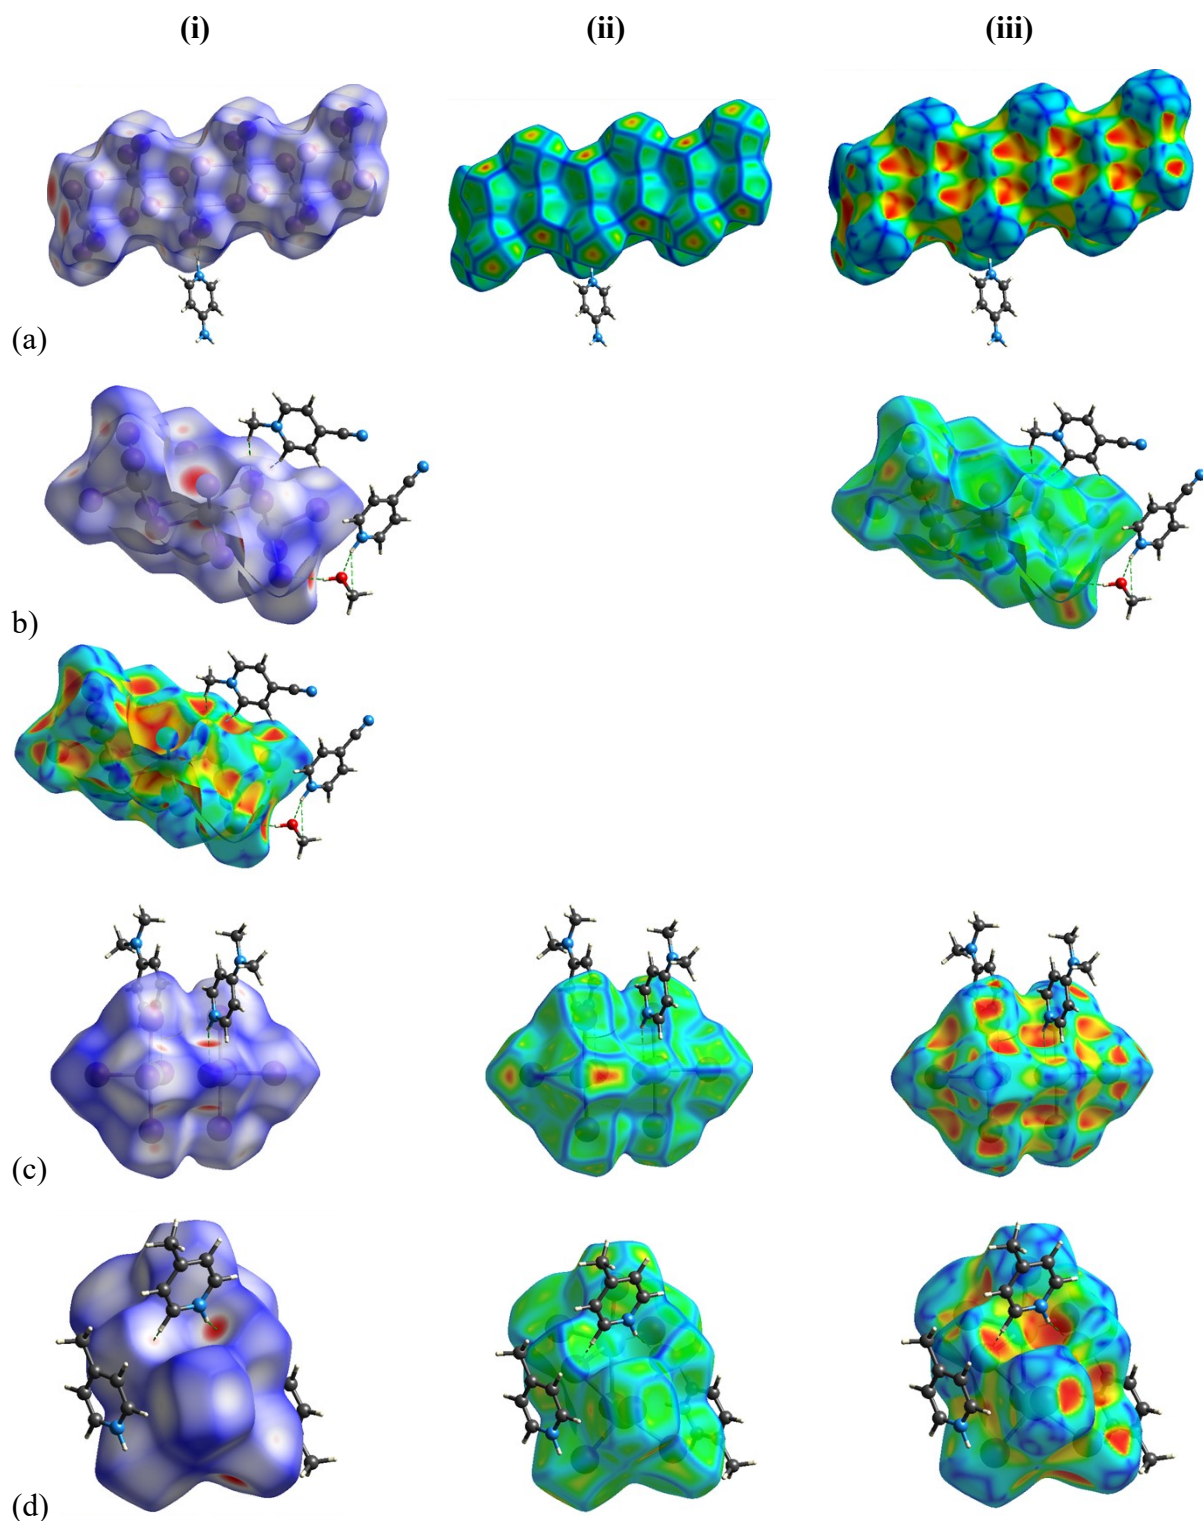

**Figure SI 5.** (i) 3D  $d_{norm}$  surface of (a) 4-AmpyBi<sub>3</sub> in the range -0.4527 to 1.1099, (b) 4-MetpyBi<sub>3</sub> ranging from -0.3428 to 1.2451 (c) 4-DmetpyBi<sub>3</sub> in the range -0.3012 to 1.1518, (d) 4-CNpyBi<sub>3</sub> in the range of -0.3383 a.u. (red) to 1.3823a.u. (blue), (ii) curvedness in the range of (-4.0000 to 0.4000), (iii) shape index in the range of (-1.0000 to 1.0000).

(a)



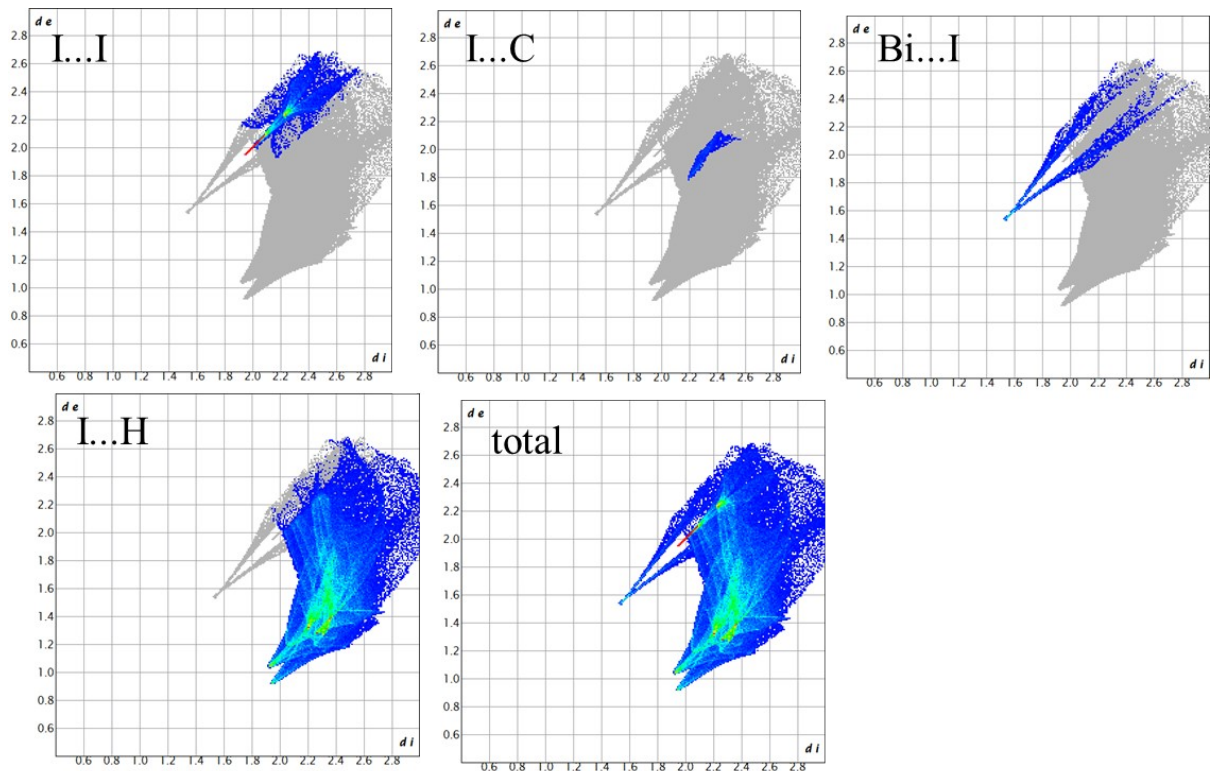

(b)

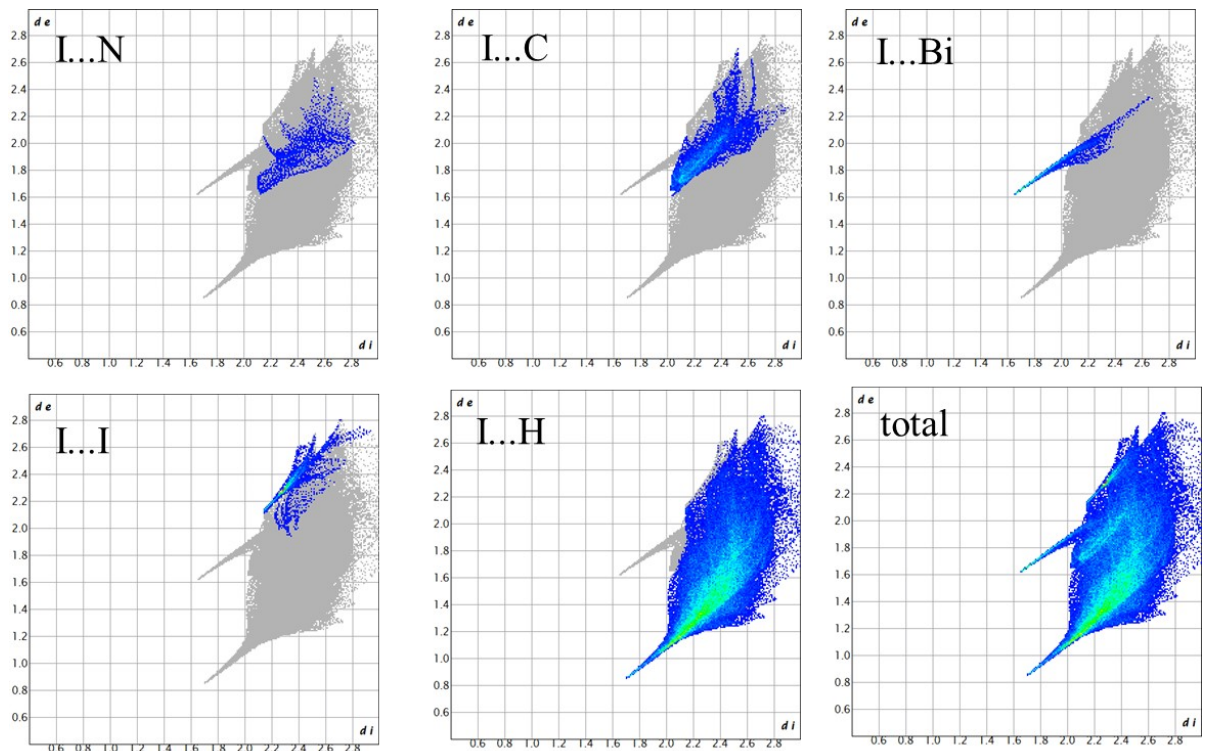

(c)

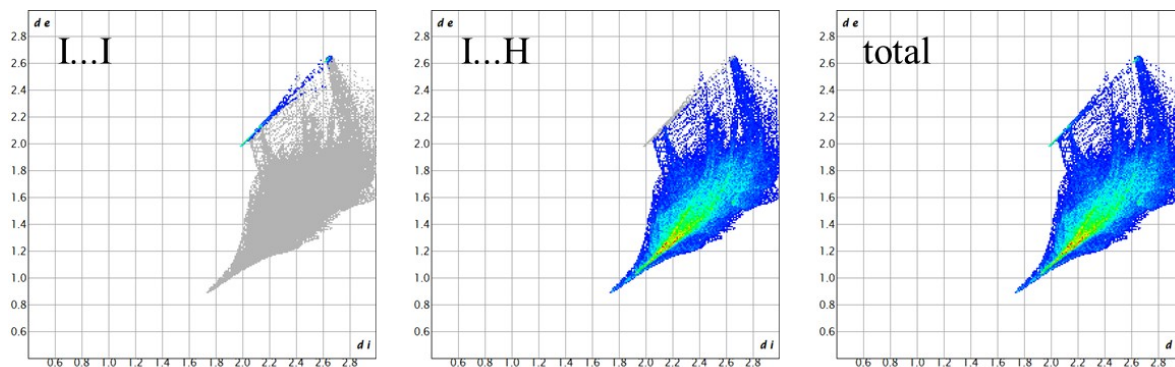

(d)

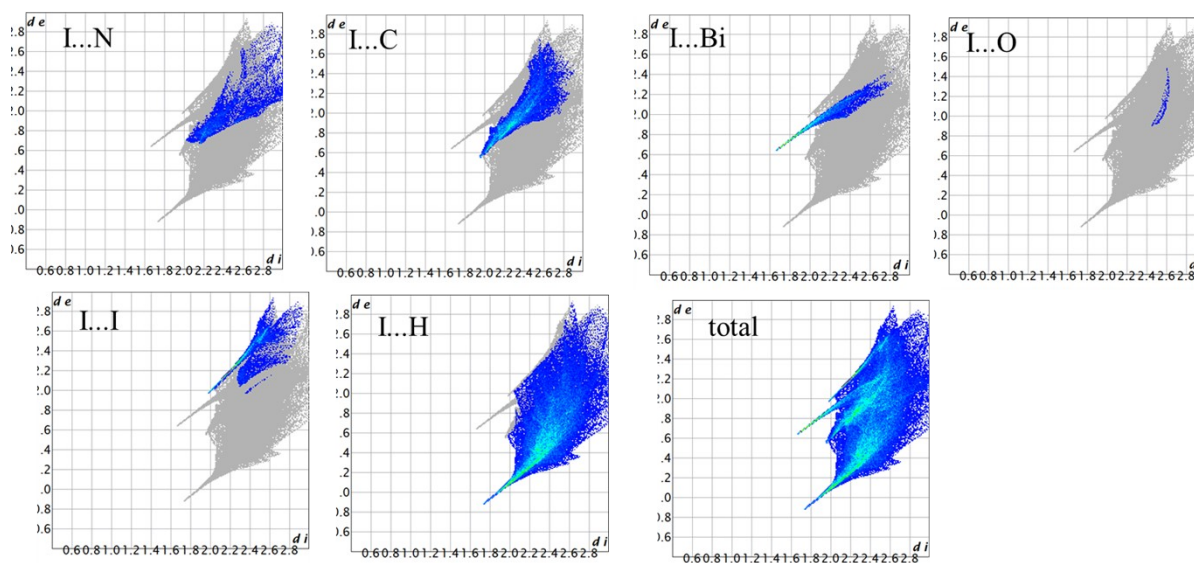

Figure SI 6. Fingerprint plots of (a) 4-AmpyBi<sub>3</sub>, (b) 4-MetpyBi<sub>3</sub>, (c) 4-DmetpyBi<sub>3</sub>, (d) 4-CNpyBi<sub>3</sub>.

**Table SI 7.** Percentage contributions of the various intermolecular contacts contributing to Hirshfeld's surfaces of the structures.

| Percentage of interaction | 4-AmpyBiI <sub>3</sub> | 4-MepyBiI <sub>3</sub> | 4-DMepyBiI <sub>3</sub> | 4-CNpyBiI <sub>3</sub> |
|---------------------------|------------------------|------------------------|-------------------------|------------------------|
| I...I                     | 12.5                   | 4.5                    | 2                       | 8.7                    |
| I...H                     | 82.5                   | 81                     | 98                      | 59.9                   |
| I...N                     | 0.3                    | 2                      | -                       | 6.5                    |
| I...C                     | 0.8                    | 9.5                    | -                       | 16.9                   |
| Bi...I                    | 3.9                    | 3                      | -                       | 7.7                    |
| Bi-O                      | -                      | -                      | -                       | 0.3                    |

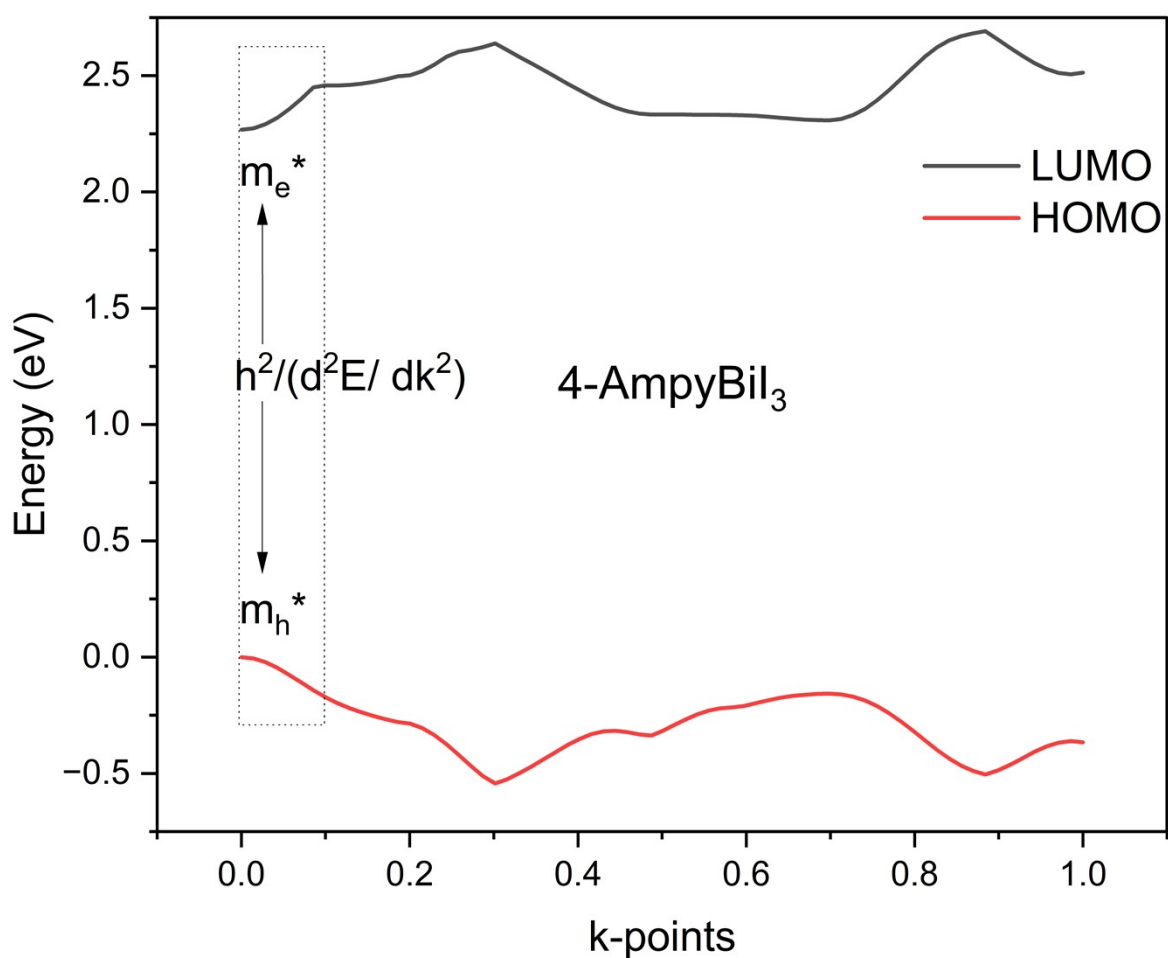

**Figure SI 7.** Minimum conduction band and maximum valence band structure and the dashed rectangular shows the region for calculation of the effective mass by the second derivative of the region.

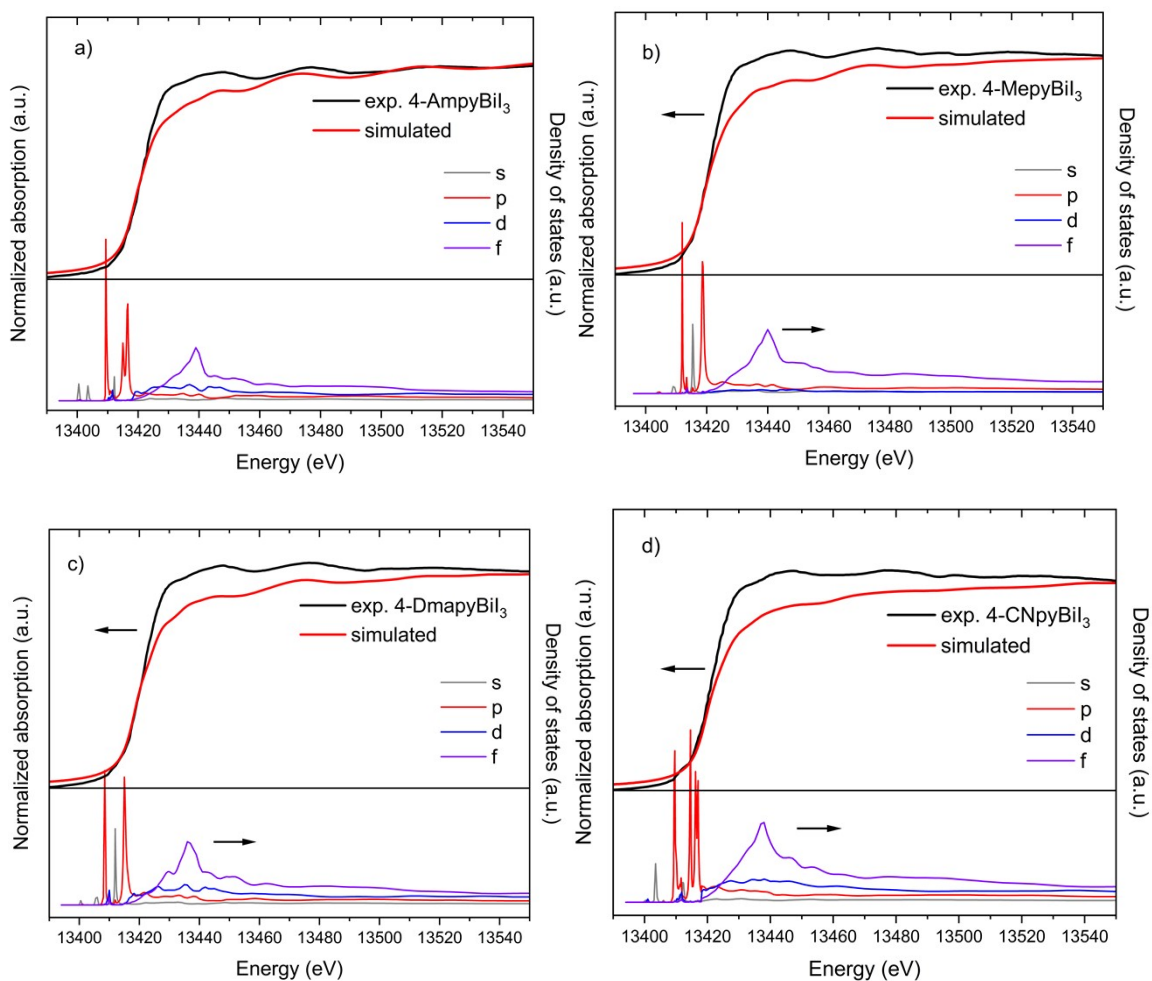

**Figure SI 8.** Experimental (black) and DFT-calculated (red) XAS spectra for 4-AmpyBiI<sub>3</sub> (a), 4-MepyBiI<sub>3</sub> (b), 4-DmapyBiI<sub>3</sub> (c) and 4-CNpyBiI<sub>3</sub> (d) at L3-edge are plotted on the left axis. The partial densities of the states projected on the absorbing Bi atom are also presented on the right axis.

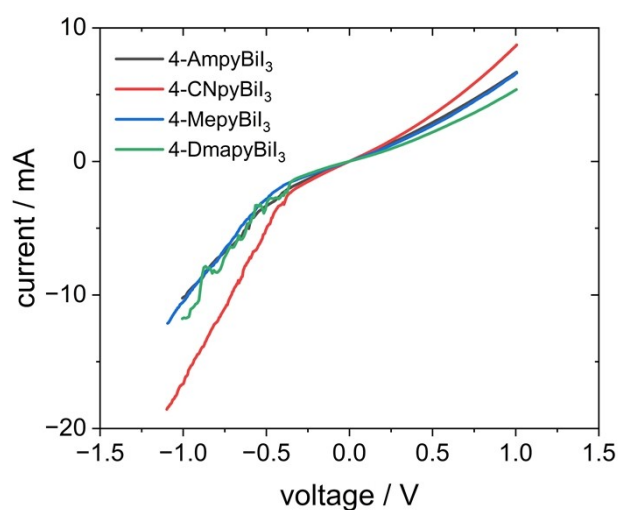

**Figure SI 9.** Current-voltage dependencies (linear scale) for all studied bismuth complexes recorded at 298 K.
